# Application of Modified Shell Vial Culture Procedure for Arbovirus Detection

Edna R. Caceda, Tadeusz J. Kochel\*

American Embassy, Naval Medical Research Center Detachment, Lima, Peru

The isolation of arboviruses from patient's low titer sera can be difficult. Here we compared the detection efficiency of Dengue (DEN), Yellow Fever (YF), Saint Louis Encephalitis (SLE), West Nile (WN), Ilheus (ILH), Group C (GC), Oropouche (ORO), Mayaro (MAY) and Venezuela Encephalitis Equine (VEE) viruses using a Modified Shell Vial Culture (MSVC) protocol to a Standard Cell Culture (SCC) protocol. First the MSVC and SCC protocols were compared using five dilutions for each of the following stock viruses: DEN-1, DEN-2, DEN-3, DEN-4, YF, SLE, WN, ILH, GC, ORO, MAY and VEE. Next, patients' original sera from which viruses (DEN-1, DEN-2, DEN-3, YF, GC, ORO, MAY and VEE) had been previously isolated were compared by the two methods using five sera dilutions. In addition, seven sera that were positive for DEN-3 by RT-PCR and negative by SCC were processed by MSVC. The MSVC protocol was consistently 1–2 logs higher virus dilution more sensitive for virus detection than the SCC protocol for all stock *Flaviviruses* tested (DEN-1, DEN-2, DEN-3, DEN-4, YF, SLE, WN and ILH). MSVC was equal to or one log more sensitive for virus detection than SCC for the stock *Bunyaviruses* (GC and ORO). For the stock *Alphavirus* MAY, MSVC was equally or one log more sensitive for virus detection than SCC, while for VEE SCC was equally or one log more sensitive for virus detection than MSVC. MSVC was consistently one to two sera dilutions more sensitive than SCC for the detection of *Flaviviruses* from patients' sera. Both methods were approximately equally sensitive for the detection of *Bunyaviruses* from patients' sera and equal or one dilution less sensitive for the detection of *Alphaviruses* from patients' sera. Additionally, MSVC detected DEN virus in five of seven DEN-3 RT-PCR positive, SCC negative patients' sera.

Citation: Caceda ER, Kochel TJ (2007) Application of Modified Shell Vial Culture Procedure for Arbovirus Detection. PLoS ONE 2(10): e1034. doi:10.1371/journal.pone.0001034

## INTRODUCTION

The isolation of arboviruses from patient's low titer sera can be difficult.

Shell vial culture centrifugation methods for virus isolation have been shown to be more sensitive than standard isolation methods for members of the *Paramyxoviridae* [1–4], *Herpesviridae* [5,6], *Orthomyxoviridae* [7] and *Flaviviridae* [8] families. DEN-2, Japanese Encephalitis (JE) and WN are the *Flaviviridae* viruses for which the Shell Vial method has been tested [9]. The original Shell Vial method has been adapted to 24 well tissue culture plates with centrifugation (Modified Shell Vial Culture (MSVC)) [8].

We have compared the MSVC and standard cell culture (SCC) methods of virus detection for the *Flaviviruses*: DEN-1, DEN-2, DEN-3, DEN-4, YF, SLE, ILH and WN; the *Bunyaviruses*: GC, ORO and the *Alphaviruses*: MAY and VEE. The comparison was made using two cell lines, C636 and Vero, two incubation times, four and 10 days, with stock viruses and original patients' sera from which viruses had previously been isolated.

## METHODS

### Stock viruses

DEN-1, DEN-2, DEN-3, DEN-4, YF, SLE, WN, ILH, GC, ORO, MAY and VEE viruses were propagated in Vero cells with Earle's Modified Essential Medium with 100 units/ml Penicillin, 100 ug/ml Streptomycin, 1 mM Sodium Pyruvate and 2% (V/V) Fetal Bovine Serum at 37°C. Upon observation of cytopathic effects, medias were collected, clarified by centrifugation at 40,000 g for five minutes and stored at –80°C until use. The *Flaviviruses* and *Bunyaviruses* were titrated in BHK-21 cells; the *Alphaviruses* were titrated in Vero cells.

### Original sera

Sera were collected from febrile subjects and processed for virus isolation following the SCC method (1:5 inoculum, 10 day

incubation, C636 and/or Vero culture) and stored at –80°C until use.

### The SCC method

100 ul of each stock virus dilution (undiluted, 100, 10, 1 and 0.1 PFU) or serum dilution (1:5, 1:10, 1:50, 1:100 and 1:500) were inoculated in C636 and Vero cells propagated in T-25 cm<sup>2</sup> flasks. The cells were incubated at 28°C and 37°C for C636 and Vero cells, respectively, for 4 and 10 days. The cells were scraped off the flasks, transferred to 5 ml test tubes and collected by centrifugation at 450 g for 10 minutes. The cell pellets were reconstituted with PBS and spotted onto slides and tested by indirect immunofluorescent assay (IFA) using DEN, YF, SLE, WN, ILH, GC, ORO, MAY and VEE polyclonal antibodies.

**Academic Editor:** Joel Montgomery, U.S. Naval Medical Research Center Detachment/Centers for Disease Control, United States of America

**Received:** April 24, 2007; **Accepted:** September 16, 2007; **Published:** October 17, 2007

This is an open-access article distributed under the terms of the Creative Commons Public Domain declaration which stipulates that, once placed in the public domain, this work may be freely reproduced, distributed, transmitted, modified, built upon, or otherwise used by anyone for any lawful purpose.

**Funding:** This study was funded by the United States Department of Defense Global Emerging Infections Systems Research Program, WORK UNIT NUMBER: 847705.82000.25GB.B0016. The sponsor had no role in this study other than providing funding.

**Competing Interests:** The authors have declared that no competing interests exist.

\* To whom correspondence should be addressed. E-mail: Tad.Kochel@med.navy.mil

## The MSVC method

100 µl of each stock virus dilution (undiluted, 100, 10, 1 and 0.1 PFU) or serum dilution (1:5, 1:10, 1:50, 1:100 and 1:500) were inoculated in C636 and Vero cells propagated in 24 wells plates. The plates were centrifuged at 680 g for 30 minutes and incubated at 33°C and 37°C for C636 and Vero cells, respectively, for 4 and 10 days. The cells were scraped off the plates, transferred to 5 ml test tubes and collected by centrifugation at 450 g for 10 minutes. The cell pellets were reconstituted with PBS and spotted onto slides and tested by IFA using DEN, YF, SLE, WN, ILH, GC, ORO, MAY and VEE polyclonal antibodies.

## RESULTS AND DISCUSSION

For all stock *Flaviviruses* tested by the two methods, the MSVC method consistently required one to two logs less virus for virus detection in C636 cells than the SCC method (Table 1). The required amount of virus for detection by MSVC in Vero cells ranged from two logs less, to equal to that, required by the SCC method. For the *Bunyaviruses*, in both cell lines, the MSVC method required equal, or one log less, virus than SCC for virus detection. The results are mixed for the *Alphaviruses*. In both cell lines, MAY like the *Bunyaviruses*, the MSVC method required equal, or one log less, virus than SCC for virus detection. With VEE, MSVC required equal, or one log more, virus for virus detection than the SCC method (Table 1).

The two methods were compared for virus detection from sera from which virus had been isolated following the SCC method. For the *Flavivirus* sera (table 2, sera 1–18) MSVC consistently required one to two dilutions less sera for virus detection than SCC. Additionally, the MSVC method identified virus in four sera that were negative for virus detection by SCC after four days of incubation (table 2: Vero cells serum 7; C636 cells sera 13,15 and 17). Virus could not be re-isolated from three sera (table 2, sera 10–12) by SCC while virus was detected after only four days of incubation by MSVC. For the *Bunyaviruses*, in both cell lines, the

MSVC method required equal, or one dilution less, serum for virus detection than SCC (table 2, sera 19–27). For the *Alphavirus* sera, MSVC required more serum for virus detected after four days of incubation for three of seven specimens in C636 culture (table 2, sera 28, 30 and 31) than SCC. However, after ten days of incubation the two methods required equal amounts of sera for virus detection for six of the seven sera. One serum (# 34) was negative for virus detection by MSVC but positive by SCC, in both cell lines.

To further compare the two methods, seven SCC negative, DEN-3 RT-PCR positive sera were assayed by MSVC. MSVC identified virus in five of seven sera after 10 days of incubation in C636 culture while SCC detected virus in three of the sera (table 2, sera 35–41).

The SCC method maybe less reproducible for virus detection than MSVC. DEN virus could not be detected in three sera (table 2, sera 10, 11 and 12) from which the viruses were originally isolated by SCC and three SCC negative, DEN-3 RT-PCR positive sera were SCC positive for DEN virus (table 2, sera 35, 40 and 41). Possibly those sera have low DEN virus titers that are at or near the limit of virus detection by SCC. However, all six specimens were positive for DEN virus by MSVC.

MSVC is a rapid and efficient method for the isolation of *Flaviviruses* (DEN-1, DEN-2, DEN-3, DEN-4, YF, SLE, WN and ILH), *Bunyaviruses* (ORO and GC) and the *Alphavirus* MAY. The SCC method could be more suitable for the isolation of the *Alphavirus* VEE. For studies that involve the isolation of arboviruses the utilization of both C636 MSVC and Vero SCC may maximize virus isolation.

## ACKNOWLEDGMENTS

Disclaimer: The views expressed in this article are those of the authors and do not necessarily reflect the official policy or position of the Department of the Navy, Department of Defense, nor the U.S. Government.

The study protocol was approved by the Naval Medical Research Center Institutional Review Board (Protocol NMRC2000.0006) in

**Table 1.** Comparison of stock virus detection by SCC and MSVC.

| VIRUS              | Genera     | C636 Cells Lowest concentration virus detected (PFU) |            |            |             | Vero Cells Lowest concentration virus detected (PFU) |            |                     |             |
|--------------------|------------|------------------------------------------------------|------------|------------|-------------|------------------------------------------------------|------------|---------------------|-------------|
|                    |            | Day 4 SCC                                            | Day 4 MSVC | Day 10 SCC | Day 10 MSVC | Day 4 SCC                                            | Day 4 MSVC | Day 10 SCC          | Day 10 MSVC |
| DEN 1 (16007)      | Flavivirus | 100                                                  | 1          | 10         | 0.1         | 10                                                   | 1          | 0.1                 | 0.1         |
| DEN 2 (16681)      | Flavivirus | 4.7×10 <sup>4</sup>                                  | 10         | 100        | 0.1         | 4.7×10 <sup>4</sup>                                  | 100        | 4.7×10 <sup>4</sup> | 0.1         |
| DEN 3 (IQD 1728)   | Flavivirus | 100                                                  | 0.1        | 10         | 0.1         | 3.0×10 <sup>3</sup>                                  | 100        | 100                 | 1           |
| DEN 4 (1036)       | Flavivirus | 10                                                   | 0.1        | 10         | 0.1         | 100                                                  | 10         | 1                   | 0.1         |
| YF (17D)           | Flavivirus | 3.2×10 <sup>5</sup>                                  | 1          | 10         | 0.1         | 10                                                   | 1          | 1                   | 0.1         |
| SLE (CDC)          | Flavivirus | 1                                                    | 0.1        | 1          | 0.1         | 0.1                                                  | 0.1        | 0.1                 | 0.1         |
| WNV (CDC)          | Flavivirus | 10                                                   | 0.1        | 0.1        | 0.1         | 0.1                                                  | 0.1        | 0.1                 | 0.1         |
| ILHEUS (ATCC)      | Flavivirus | 10                                                   | 0.1        | 100        | 0.1         | 1                                                    | 0.1        | 0.1                 | 0.1         |
| ILHEUS (FSE 0800)  | Flavivirus | 100                                                  | 0.1        | 10         | 0.1         | 0.1                                                  | 1          | 0.1                 | 0.1         |
| GROUP C (IQU 1719) | Bunyavirus | 1                                                    | 0.1        | 0.1        | 0.1         | 0.1                                                  | 0.1        | 0.1                 | 0.1         |
| ORPOUCHE 172       | Bunyavirus | 10                                                   | 1          | 10         | 0.1         | 10                                                   | 1          | 1                   | 1           |
| MAYARO (TRVL15537) | Alphavirus | 10                                                   | 1          | 10         | 1           | 10                                                   | 1          | 10                  | 10          |
| VEE (TC 83)        | Alphavirus | 0.1                                                  | 1          | 0.1        | 0.1         | 0.1                                                  | 0.1        | 0.1                 | 1           |

doi:10.1371/journal.pone.0001034.t001

**Table 2.** Comparison of virus detection in sera by SCC and MSVC.

| Serum # | SCC (C6/36<br>1:5 Isolate) | RT-PCR | C636 Cells Highest dilution virus detected |               |               |                | Vero Cells Highest dilution virus detected |               |               |                |
|---------|----------------------------|--------|--------------------------------------------|---------------|---------------|----------------|--------------------------------------------|---------------|---------------|----------------|
|         |                            |        | Day 4<br>SCC                               | Day 4<br>MSVC | Day 10<br>SCC | Day 10<br>MSVC | Day 4<br>SCC                               | Day 4<br>MSVC | Day 10<br>SCC | Day 10<br>MSVC |
| 1       | D1                         |        | 1:500                                      | 1:500         | 1:500         | 1:500          | 1:100                                      | 1:500         | 1:500         | 1:500          |
| 2       | D1                         |        | 1:500                                      | 1:500         | 1:500         | 1:500          | 1:50                                       | 1:100         | 1:500         | 1:500          |
| 3       | D1                         |        | 1:500                                      | 1:500         | 1:500         | 1:500          | 1:100                                      | 1:500         | 1:500         | 1:500          |
| 4       | D2                         |        | 1:50                                       | 1:100         | 1:100         | 1:500          | NEG                                        | 1:10          | 1:5           | 1:10           |
| 5       | D2                         |        | 1:100                                      | 1:500         | 1:500         | 1:500          | 1:5                                        | 1:10          | 1:10          | 1:10           |
| 6       | D3                         |        | 1:500                                      | 1:500         | 1:500         | 1:500          | 1:500                                      | 1:500         | 1:500         | 1:500          |
| 7       | D3                         |        | 1:100                                      | 1:500         | 1:100         | 1:500          | NEG                                        | 1:500         | 1:500         | 1:500          |
| 8       | D3                         |        | 1:500                                      | 1:500         | 1:500         | 1:500          | 1:500                                      | 1:500         | 1:500         | 1:500          |
| 9       | D3                         |        | 1:5                                        | 1:500         | 1:5           | 1:500          | NEG                                        | NEG           | NEG           | NEG            |
| 10      | D3                         |        | NEG                                        | 1:100         | NEG           | 1:500          | NEG                                        | NEG           | NEG           | NEG            |
| 11      | D3                         |        | NEG                                        | 1:100         | NEG           | 1:500          | NEG                                        | NEG           | NEG           | NEG            |
| 12      | D3                         |        | NEG                                        | 1:5           | NEG           | 1:500          | NEG                                        | NEG           | NEG           | NEG            |
| 13      | D3                         |        | NEG                                        | 1:500         | 1:5           | 1:500          | NEG                                        | NEG           | NEG           | NEG            |
| 14      | D3                         |        | 1:50                                       | 1:500         | 1:50          | 1:500          | NEG                                        | NEG           | NEG           | 1:10           |
| 15      | D3                         |        | NEG                                        | 1:500         | 1:10          | 1:500          | NEG                                        | NEG           | NEG           | NEG            |
| 16      | D3                         |        | 1:100                                      | 1:500         | 1:500         | 1:500          | NEG                                        | NEG           | 1:500         | 1:500          |
| 17      | D3                         |        | NEG                                        | 1:10          | 1:50          | 1:500          | NEG                                        | NEG           | NEG           | NEG            |
| 18      | YF                         |        | 1:100                                      | 1:500         | 1:100         | 1:500          | 1:50                                       | 1:500         | 1:100         | 1:500          |
| 19      | GC                         |        | 1:50                                       | 1:500         | 1:100         | 1:500          | 1:5                                        | 1:10          | 1:5           | 1:10           |
| 20      | GC                         |        | 1:100                                      | 1:500         | 1:500         | 1:500          | 1:10                                       | 1:50          | 1:100         | 1:100          |
| 21      | GC                         |        | 1:50                                       | 1:500         | 1:100         | 1:500          | 1:50                                       | 1:500         | 1:50          | 1:500          |
| 22      | ORO                        |        | 1:500                                      | 1:500         | 1:500         | 1:500          | 1:500                                      | 1:500         | 1:500         | 1:500          |
| 23      | ORO                        |        | 1:500                                      | 1:500         | 1:500         | 1:500          | 1:500                                      | 1:500         | 1:500         | 1:500          |
| 24      | ORO                        |        | 1:500                                      | 1:500         | 1:500         | 1:500          | 1:500                                      | 1:500         | 1:500         | 1:500          |
| 25      | ORO                        |        | 1:500                                      | 1:500         | 1:500         | 1:500          | 1:500                                      | 1:500         | 1:500         | 1:500          |
| 26      | ORO                        |        | 1:500                                      | 1:500         | 1:500         | 1:500          | 1:500                                      | 1:500         | 1:500         | 1:500          |
| 27      | ORO                        |        | 1:500                                      | 1:500         | 1:500         | 1:500          | 1:500                                      | 1:500         | 1:500         | 1:500          |
| 28      | MAY                        |        | 1:500                                      | 1:100         | 1:500         | 1:500          | 1:5                                        | 1:5           | 1:10          | 1:50           |
| 29      | MAY                        |        | 1:500                                      | 1:500         | 1:500         | 1:500          | 1:10                                       | 1:10          | 1:10          | 1:50           |
| 30      | MAY                        |        | 1:500                                      | 1:100         | 1:500         | 1:500          | 1:500                                      | 1:100         | 1:500         | 1:500          |
| 31      | VEE                        |        | 1:500                                      | 1:100         | 1:500         | 1:500          | 1:500                                      | 1:500         | 1:500         | 1:500          |
| 32      | VEE                        |        | 1:500                                      | 1:500         | 1:500         | 1:500          | 1:500                                      | 1:500         | 1:500         | 1:500          |
| 33      | VEE                        |        | 1:500                                      | 1:500         | 1:500         | 1:500          | 1:500                                      | 1:500         | 1:500         | 1:500          |
| 34      | VEE                        |        | 1:50                                       | NEG           | 1:5           | NEG            | 1:50                                       | NEG           | 1:10          | NEG            |
| 35      | NEG                        | D3     | NEG                                        | NEG           | 1:5           | 1:50           | NEG                                        | NEG           | NEG           | NEG            |
| 36      | NEG                        | D3     | NEG                                        | NEG           | NEG           | NEG            | NEG                                        | NEG           | NEG           | NEG            |
| 37      | NEG                        | D3     | NEG                                        | NEG           | NEG           | NEG            | NEG                                        | NEG           | NEG           | NEG            |
| 38      | NEG                        | D3     | NEG                                        | 1:10          | NEG           | 1:50           | NEG                                        | NEG           | NEG           | NEG            |
| 39      | NEG                        | D3     | NEG                                        | 1:10          | NEG           | 1:50           | NEG                                        | NEG           | NEG           | 1:500          |
| 40      | NEG                        | D3     | NEG                                        | 1:50          | NEG           | 1:5            | NEG                                        | 1:50          | 1:10          | 1:500          |
| 41      | NEG                        | D3     | 1:10                                       | 1:500         | 1:100         | 1:500          | NEG                                        | NEG           | NEG           | 1:500          |

doi:10.1371/journal.pone.0001034.t002

compliance with all applicable Federal regulations governing the protection of human subjects.

Authors Tadeusz J. Kochel and Edna R. Caceda are military service members (or employees of the U.S. Government). This work was prepared as part of their official duties. Title 17 U.S.C. § 105 provides that 'Copyright protection under this title is not available for any work of the United States Government'. Title 17 U.S.C. § 101 defines a U.S.

Government work as a work prepared by a military service members or employees of the U.S. Government as part of those person's official duties.

## Author Contributions

Conceived and designed the experiments: TK EC. Performed the experiments: EC. Analyzed the data: TK EC. Wrote the paper: TK EC.

## REFERENCES

1. Engler HD, Preuss J (1997) Laboratory Diagnosis of Respiratory Virus Infections in 24 Hours by Utilizing Shell Vial Cultures. *J Clin Microbiol.* Aug; pp 2165–2167.
2. Johnston SL, Siegel CS (1990) Evaluation of direct immunofluorescence, enzyme immunoassay, centrifugation culture, and conventional culture for the detection of respiratory syncytial virus. *J Clin Microbiol.* Nov; 28(11): 2394–7.
3. Lee SH, Boutilier JE, Mac Donald MA, Forward KR (1992) Enhanced detection of respiratory viruses using the shell vial technique and monoclonal antibodies. *J Virol Methods.* Sep; 39(1–2): 39–46.
4. Whistler T, Blackburn N (1997) A rapid culture assay for examining measles virus infections from urine specimens. *Clin Diagn Virol.* Feb; 7(3): 193–200.
5. Buller RS, Gaudreault-Keener M, Rossiter-Fornoff J, Storch GA (1995) Direct quantitative comparison of shell vial and conventional culture for detection of CMV viremia. *Clin Diagn Virol.* May; 3(4): 317–22.
6. Crist GA, Langer JM, Woods GL, Procter M, Hillyard DR (2004) Evaluation of the ELVIS plate method for the detection and typing of herpes simplex virus in clinical specimens. *Diagn Microbiol Infect Dis.* Jul; 49(3): 173–7.
7. Steed LL, Salmon VC, Overall JC Jr (1994) Identification of influenza A virus by shell vial culture and two commercially available detection methods. *Clin Diagn Virol.* Jun; 2(3): 181–9.
8. Rodriguez R, Alvarez M, Guzman MG, Morier L, Kouri G (2000) Comparison of Rapid Centrifugation Assay with Conventional Tissue Culture Method for Isolation of Dengue 2 Virus in C6/36-HT Cells. *J Clin Microbiol.* Sep; 38(9): 3508–10.
9. Rangaiah JS, Potula RV, Srinivasan SS, Badrinath BS (2006) Shell Vial culture Assay for the rapid diagnosis of Japanese encephalitis, West Nile and Dengue-2 viral encephalitis. *Virology Journal.* 3: 2.
